# Supplementary material
Source: MDPI journal article supplement (https://www.mdpi.com/2075-4426/12/4/653)
Supplement: s1 [file s1]

Archive with 1 entries (1 files):
- jpm-1647370(2) (2).pdf
